# Supplementary material
Source: PubMed Central journal article supplement (PMC9903927)

## Supplemental Materials

Public health guideline compliance and perceived government effectiveness during the COVID-19 pandemic in Canada: findings from a longitudinal cohort study

Emily E. Levitt<sup>a</sup>, Mahmood R. Gohari<sup>a</sup>, Sabrina K. Syan<sup>a</sup>, Kyla Belisario<sup>a</sup>, Jessica Gillard<sup>a</sup>, Jane DeJesus<sup>a</sup>, Anthony Levitt<sup>b</sup>, James MacKillop<sup>a,c,\*</sup>

### Supplemental Figure 5

Compliance

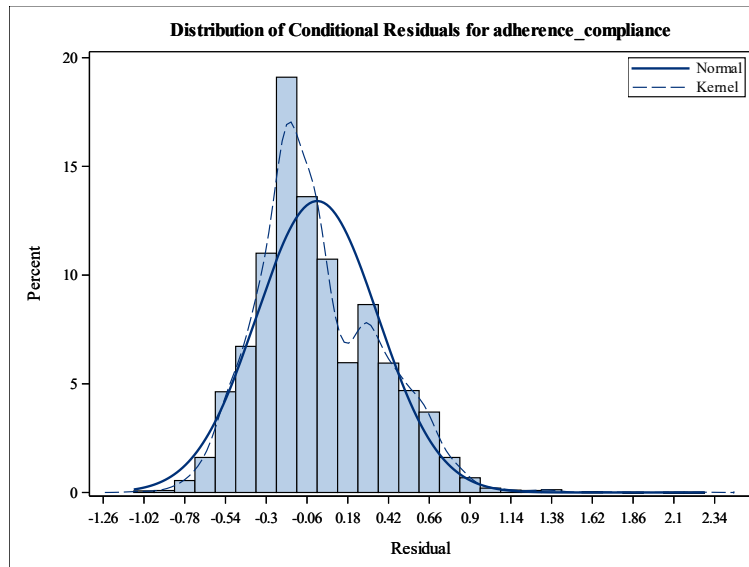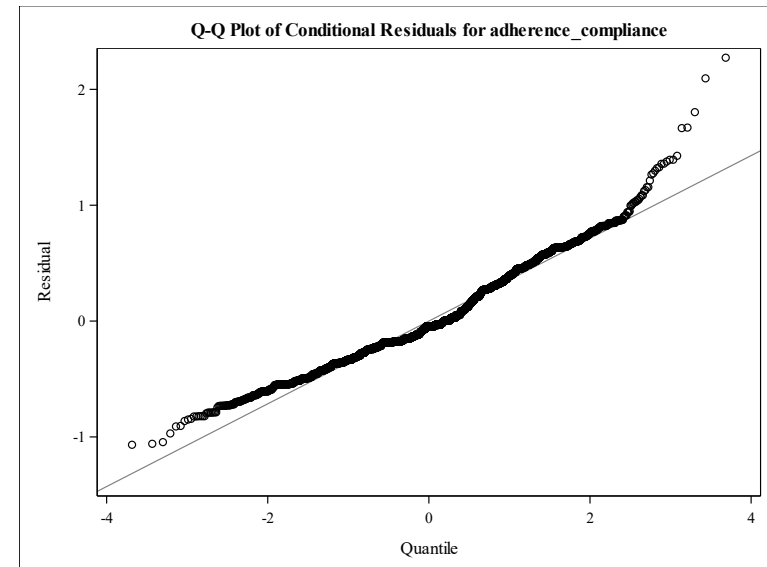

Importance

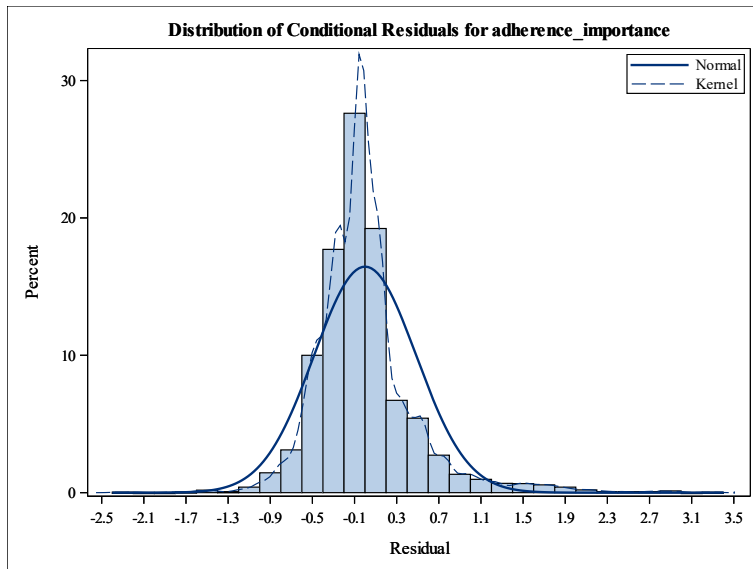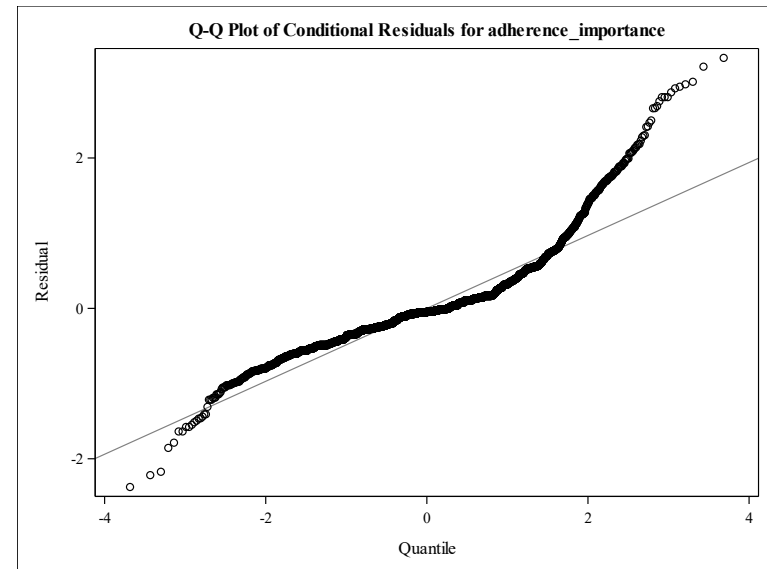

Effectiveness

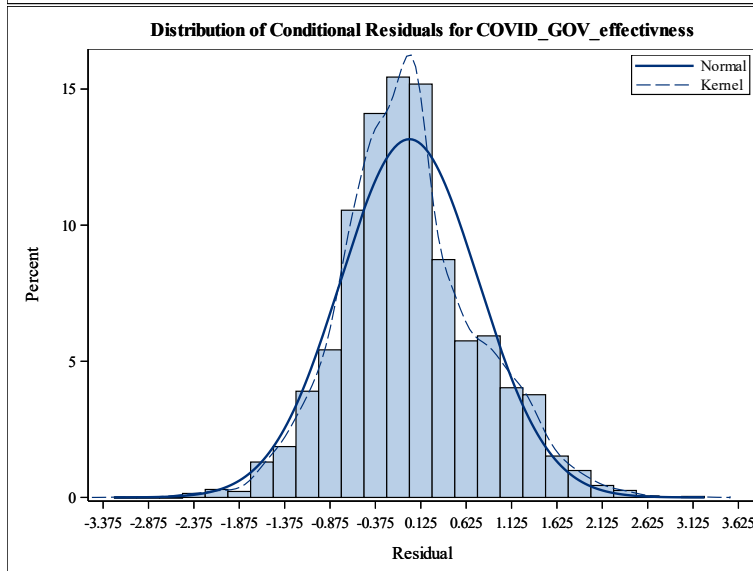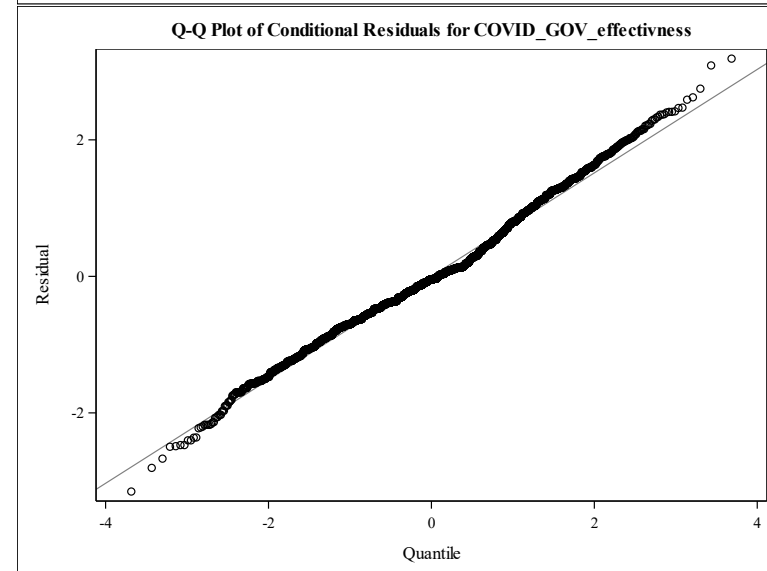

Supplement: mmc5.pdf [file mmc5.pdf]
